# Supplementary material for: Identification of Potential Nematicidal Compounds against the Pine Wood Nematode, Bursaphelenchus xylophilus through an In Silico Approach
Source: PubMed Central journal article supplement (PMC6100573; doi:10.3390/molecules23071828), 2018-07-23
Supplement: molecules-23-01828-s001.pdf [file molecules-23-01828-s001.pdf]

## **Supplementary Data**

### **Identification of potential nematicidal compounds against the pine wood nematode, *Bursaphelenchus xylophilus* through in silico approach**

**Gnanendra Shanmugam<sup>1</sup>, Sun Keun Lee<sup>2</sup> and Junhyun Jeon<sup>1\*</sup>**

<sup>1</sup>Department of Biotechnology, College of Life and Applied Sciences, Yeungnam University, Gyeongsan, Gyeongbuk, 38541, Korea; gnani.science@gmail.com

<sup>2</sup>Division of Forest Insect Pests and Diseases, National Institute of Forest Science, Seoul 02455, Korea; lskyou@korea.kr

\* Correspondence to Junhyun Jeon

Phone: +82 2 810-3030

E-mail: jjeon@yu.ac.kr

## Supplementary Figures

### Supplementary Figure S1

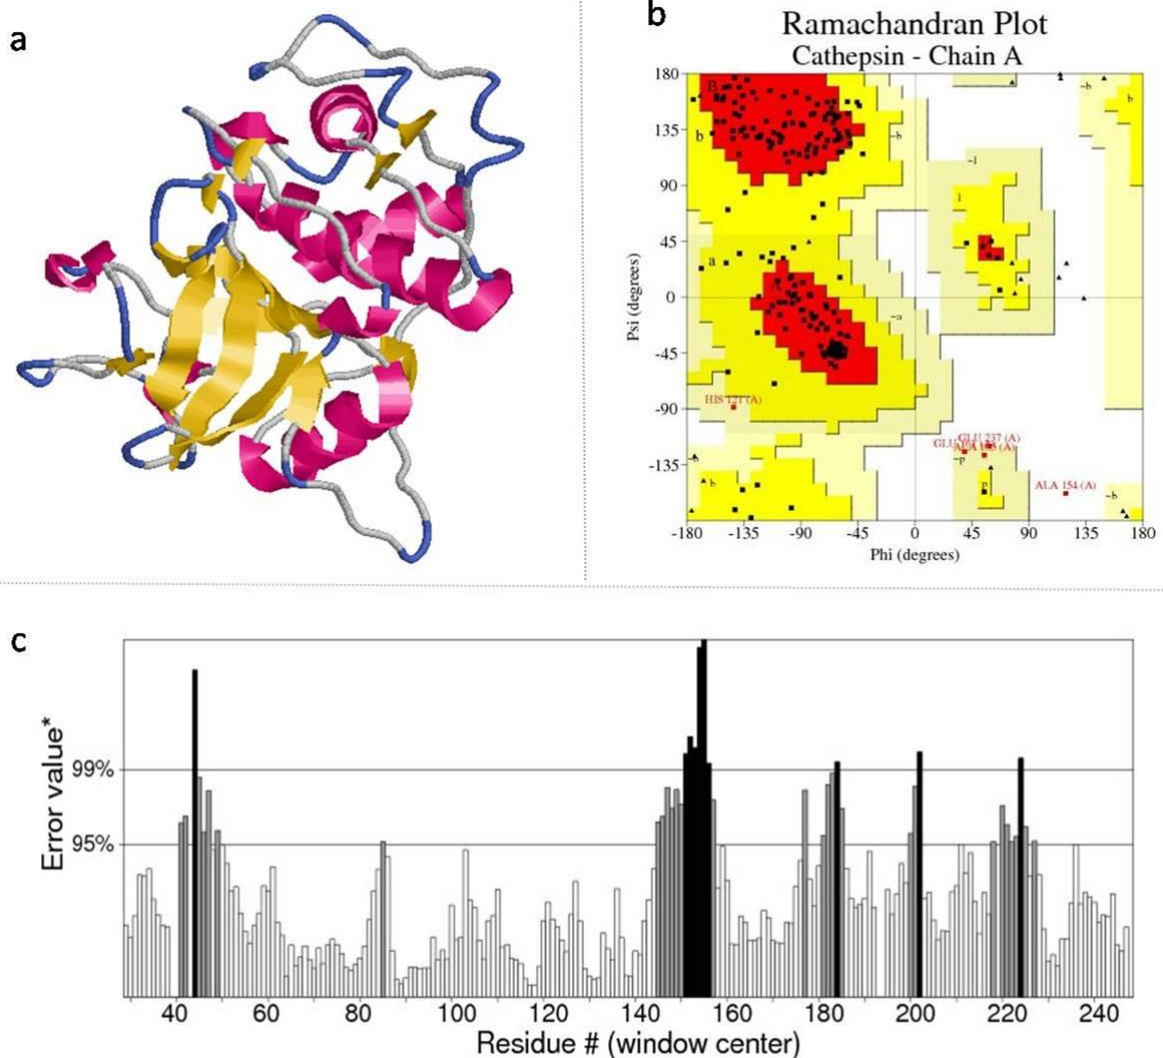

Theoretical model of Cathepsin L- Like cysteine proteinase (BxCLCP) structure and model validation through SAVES server. a. The 3D structure of built protein in cartoon representation and structure colors: Helices (magenta), Sheets(yellow) and turns /loops (blue). b. Model validation by Ramachandran plot. c. ERRAT Plot showing the generated model as good high resolution as the regions of the modeled structure that can be rejected at the 95% and 99% of confidence is very low.

Supplementary Figure S2

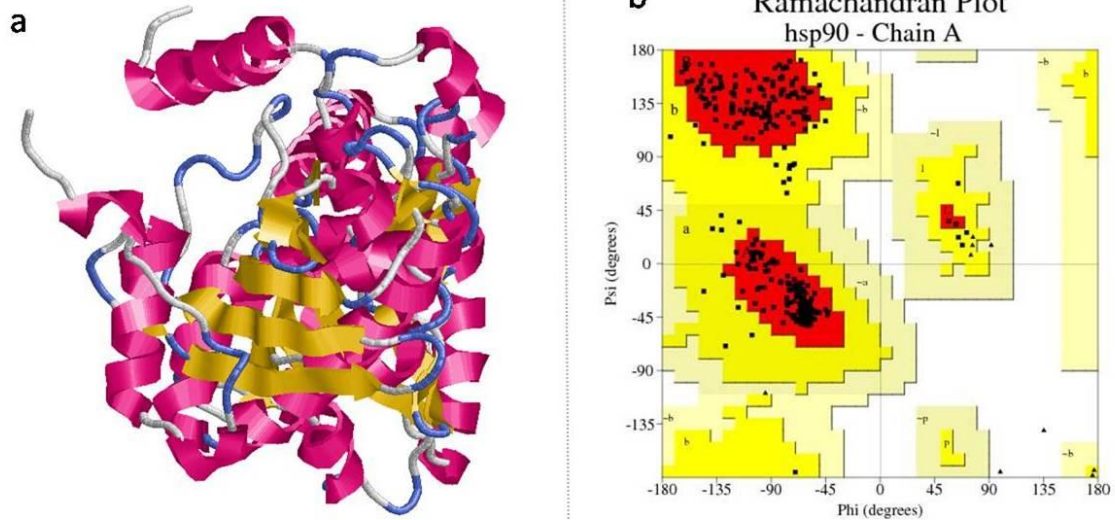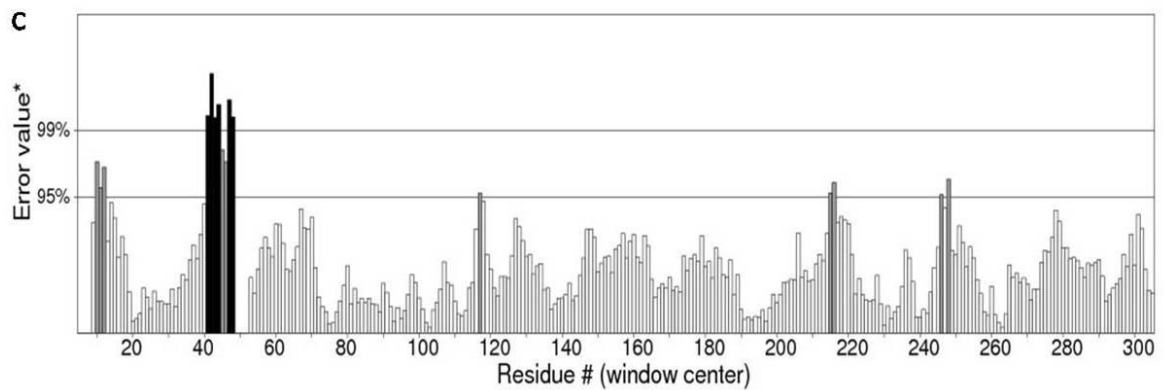

Theoretical model of Heat Shock Protein 90 (BxHSP90) structure and model validation through SAVES server. a. The 3D structure of built protein in cartoon representation and structure colors: Helices (magenta), Sheets(yellow) and turns /loops (blue). b. Model validation by Ramachandran plot. c. ERRAT Plot showing the generated model as good high resolution as the regions of the modeled structure that can be rejected at the 95% and 99% of confidence is very low.

Supplementary Figure S3

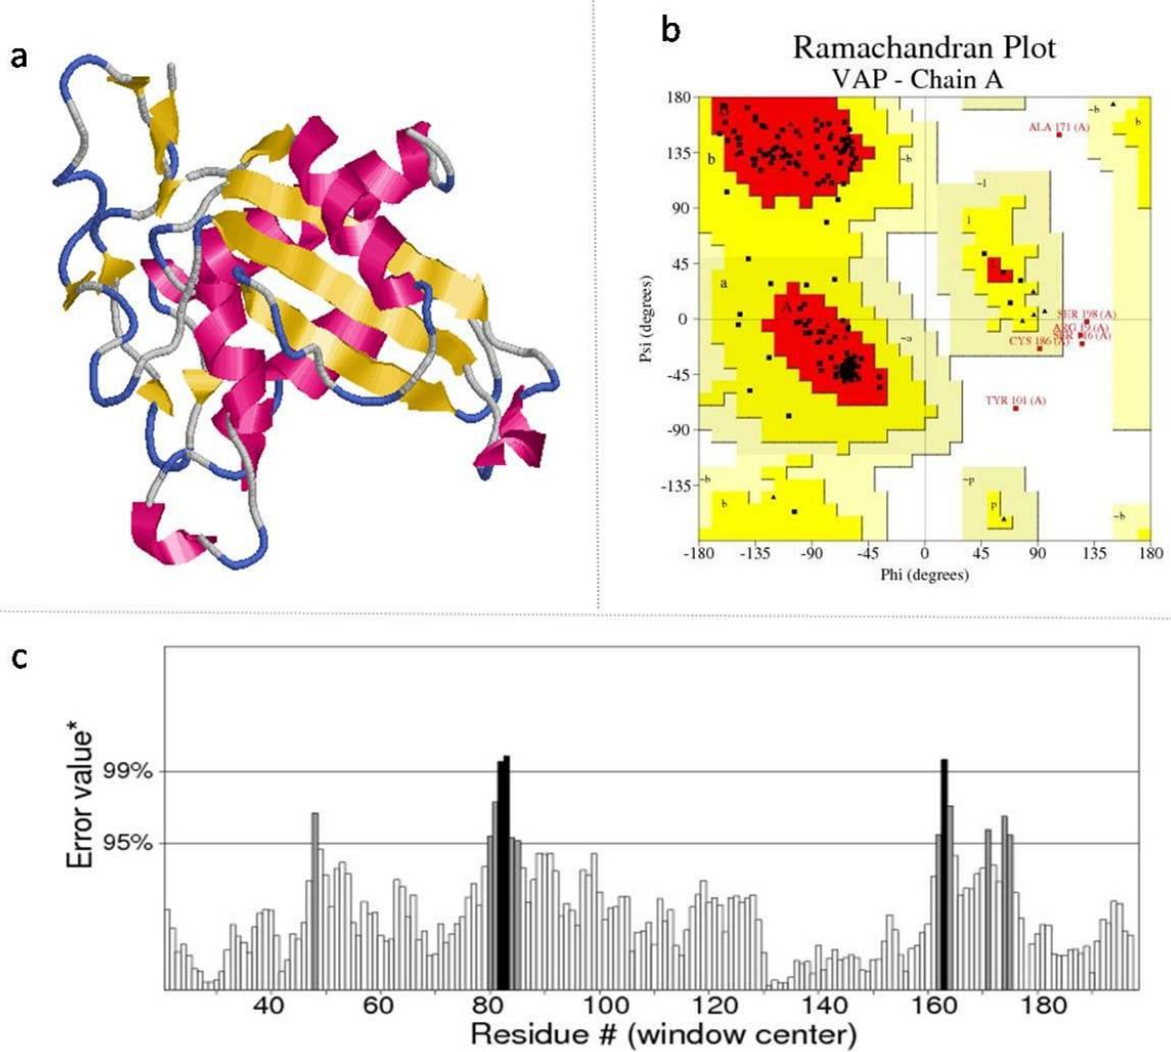

Theoretical model of Venom allergen Protein-3 (BxVAP-3) structure and model validation through SAVES server. a. The 3D structure of built protein in cartoon representation and structure colors: Helices (magenta), Sheets(yellow) and turns /loops (blue). b. Model validation by Ramachandran plot. c. ERRAT Plot showing the generated model as good high resolution as the regions of the modeled structure that can be rejected at the 95% and 99% of confidence is very low.

Supplementary Figure S4

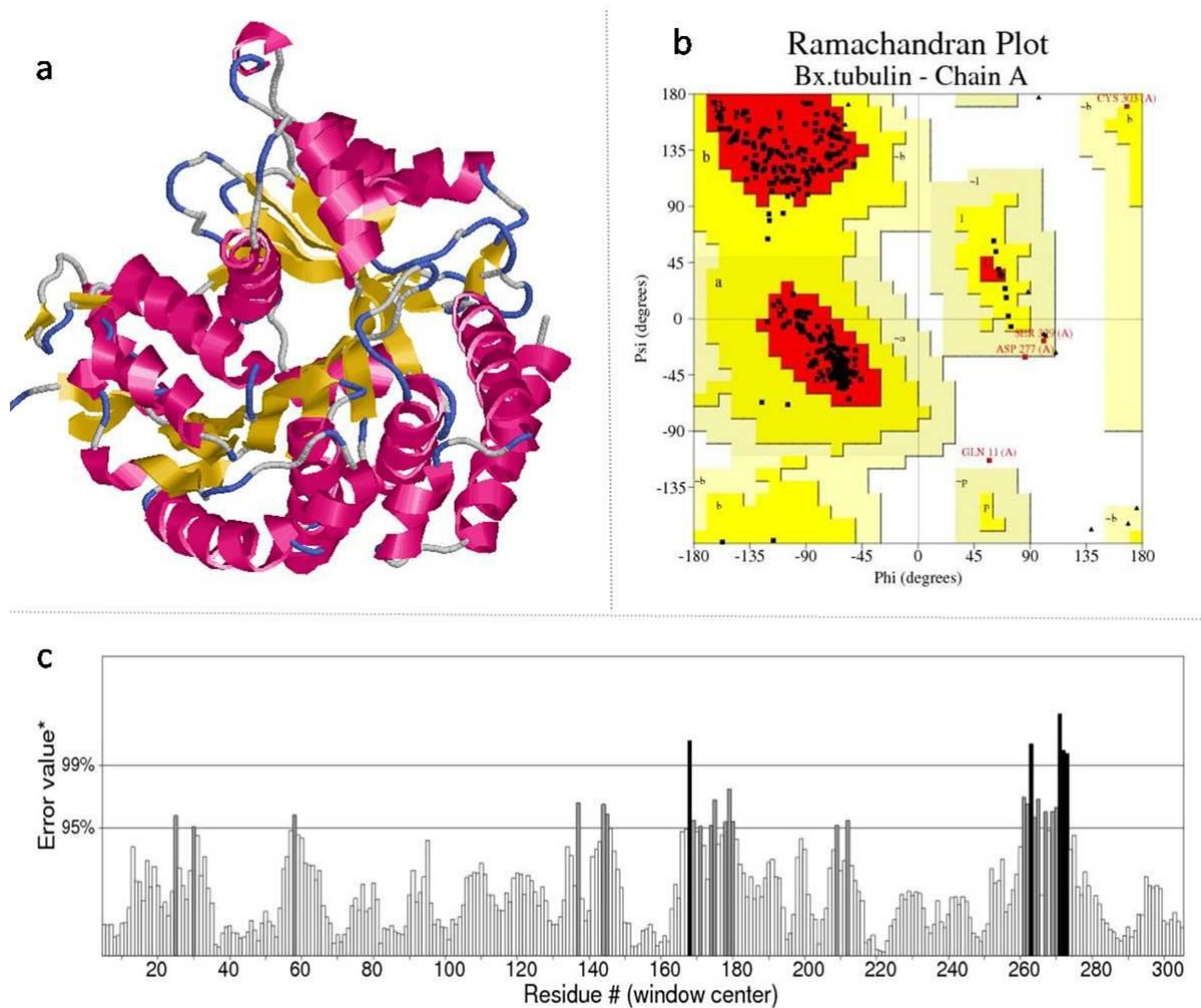

Theoretical model of  $\beta$ -Tubulin (BxTUB) structure and model validation through SAVES server. a. The 3D structure of built protein in cartoon representation and structure colors: Helices (magenta), Sheets(yellow) and turns /loops (blue). b. Model validation by Ramachandran plot. c. ERRAT Plot showing the generated model as good high resolution as the regions of the modeled structure that can be rejected at the 95% and 99% of confidence is very low.

Supplementary Figure S5

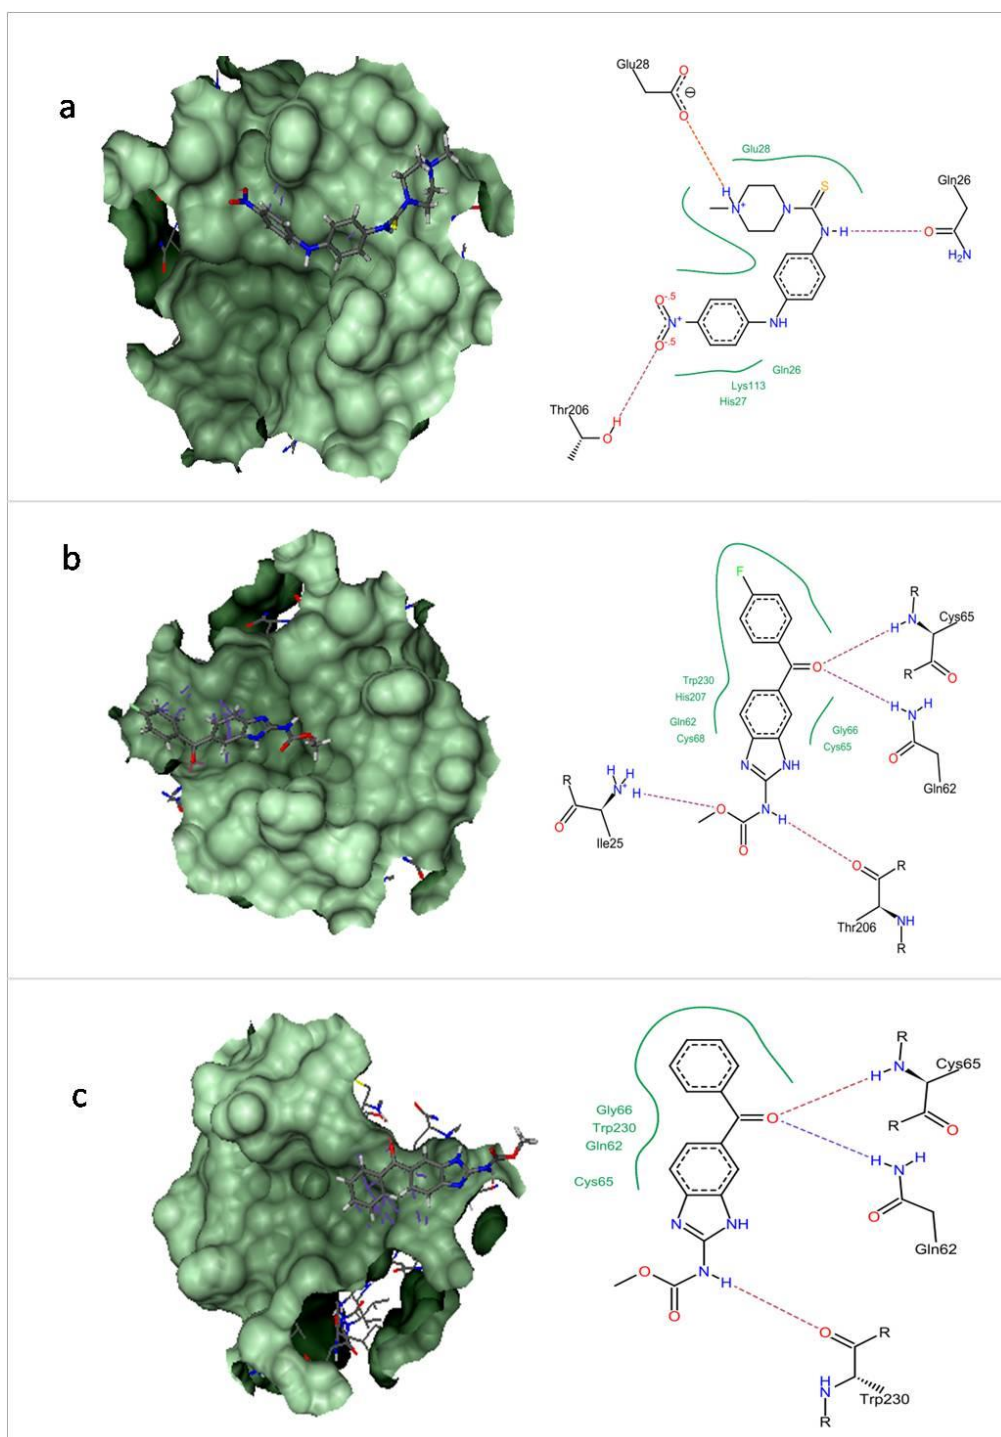

The docking complex and interactions of best docked compounds with Cathepsin L- Like cysteine proteinase (BxCLCP) from *B. xylophilus* . a. Amocarzine (Binding energy: -18.752 kJ/mol) b. Flubendazole (binding energy: -19.364 kJ/mol) c. Mebendazole (binding energy : -18.322 kJ/mol)

Supplementary Figure S6

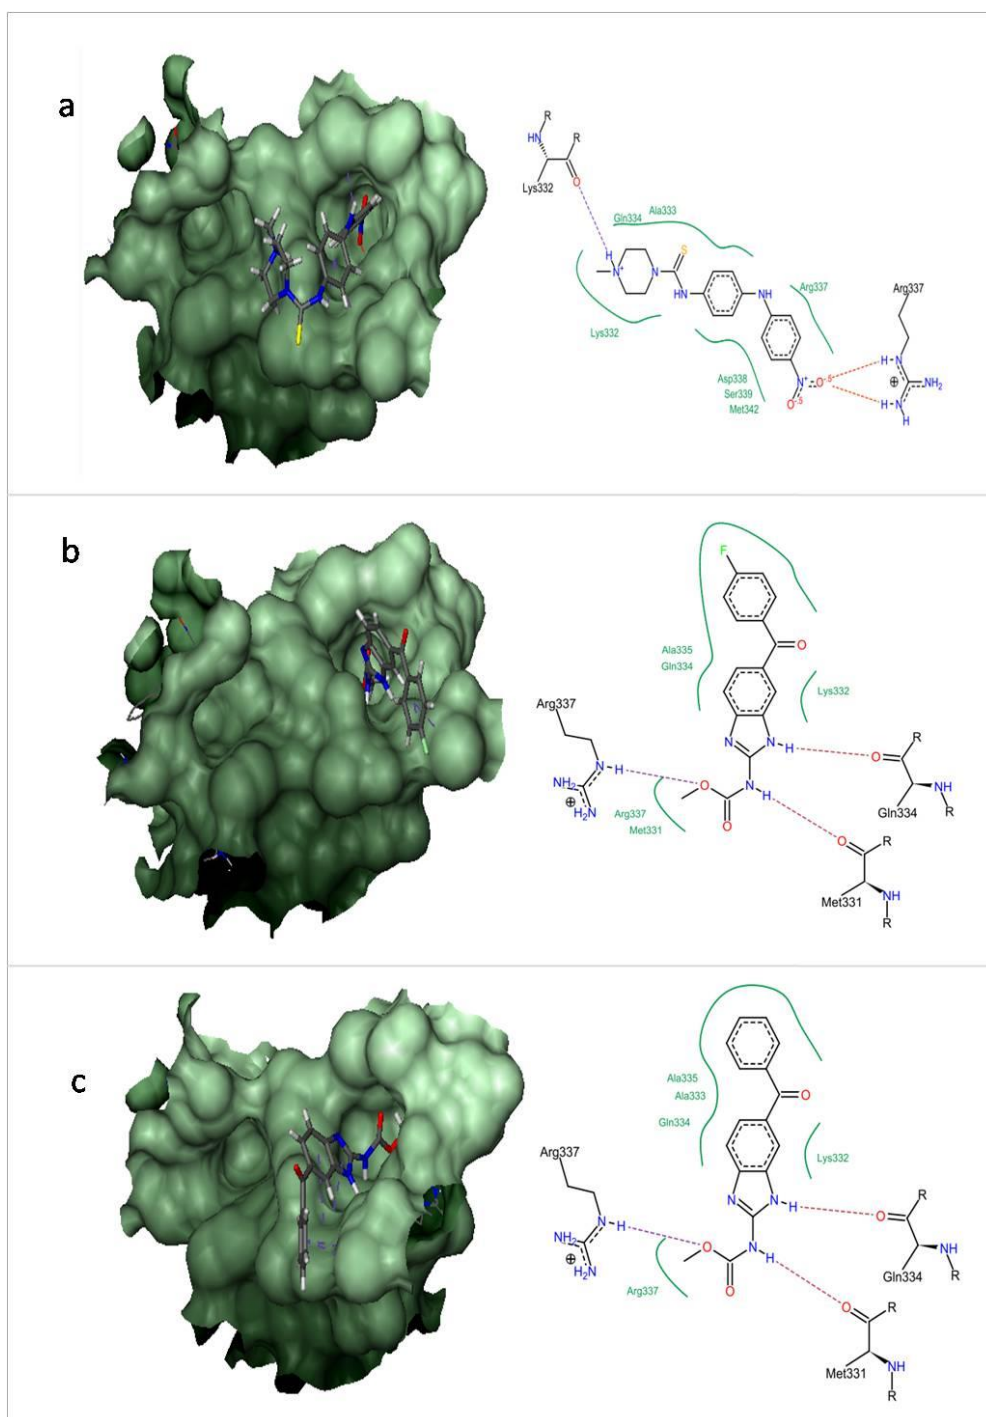

The docking complex and interactions of best docked compounds with Heat Shock Protein 90 (BxHSP90) from *B. xylophilus*. a. Amocarzine (Binding energy: -22.895 kJ/mol) b. Flubendazole (binding energy: -15.053 kJ/mol) c. Mebendazole (binding energy : -18.993 kJ/mol)

Supplementary Figure S7

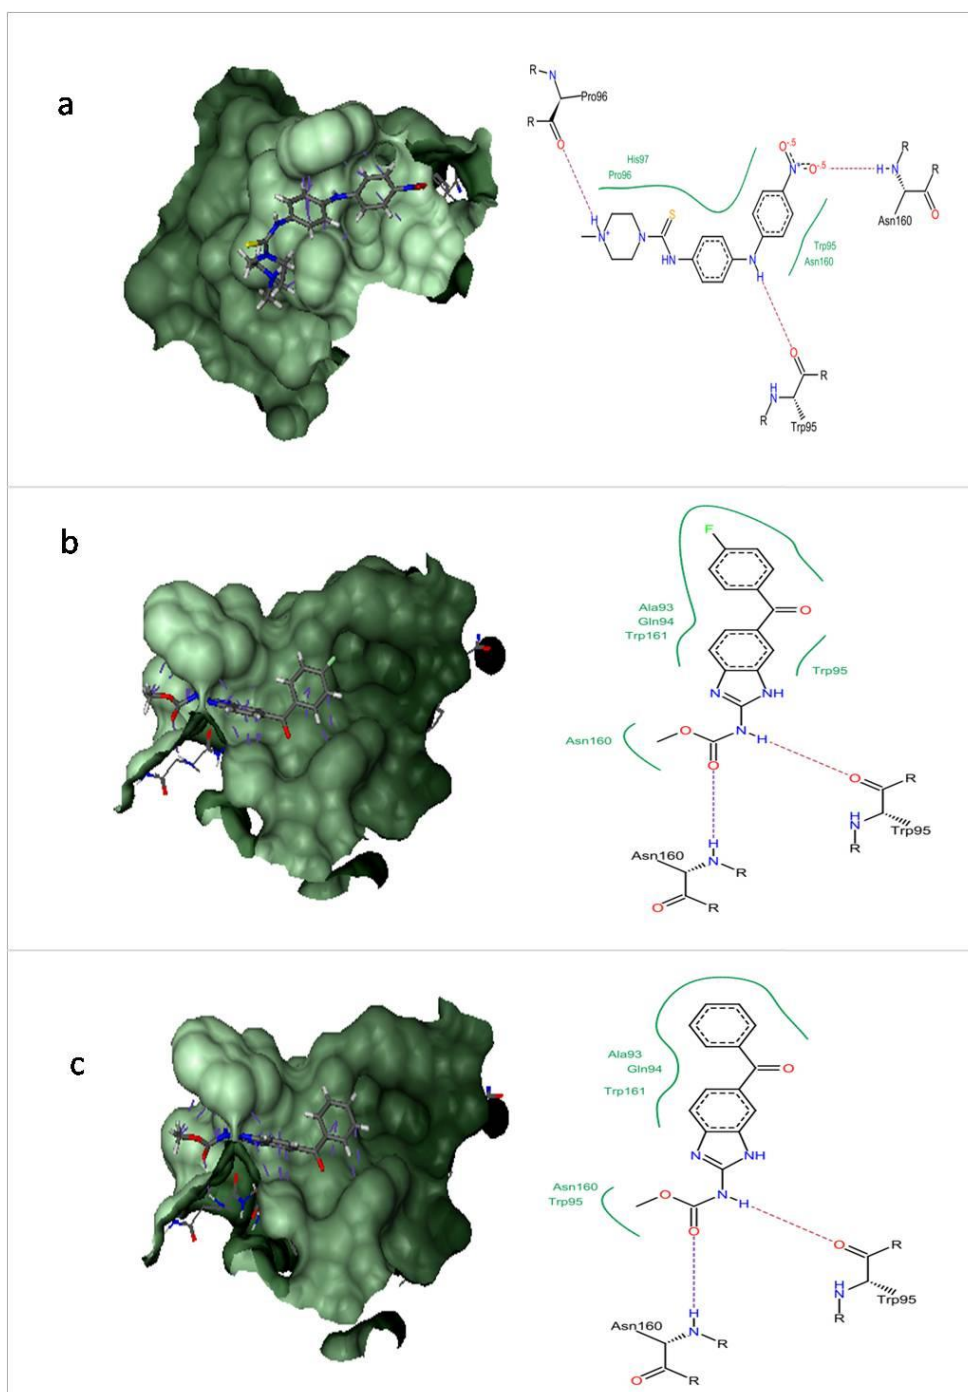

The docking complex and interactions of best docked compounds with Venom allergen Protein-3 (BxVAP-3) from *B. xylophilus* . a. Amocarzine (Binding energy: -19.279 kJ/mol) b. Flubendazole (binding energy: -17.962 kJ/mol) c. Mebendazole (binding energy : -18.699 kJ/mol)



Supplementary Figure S8

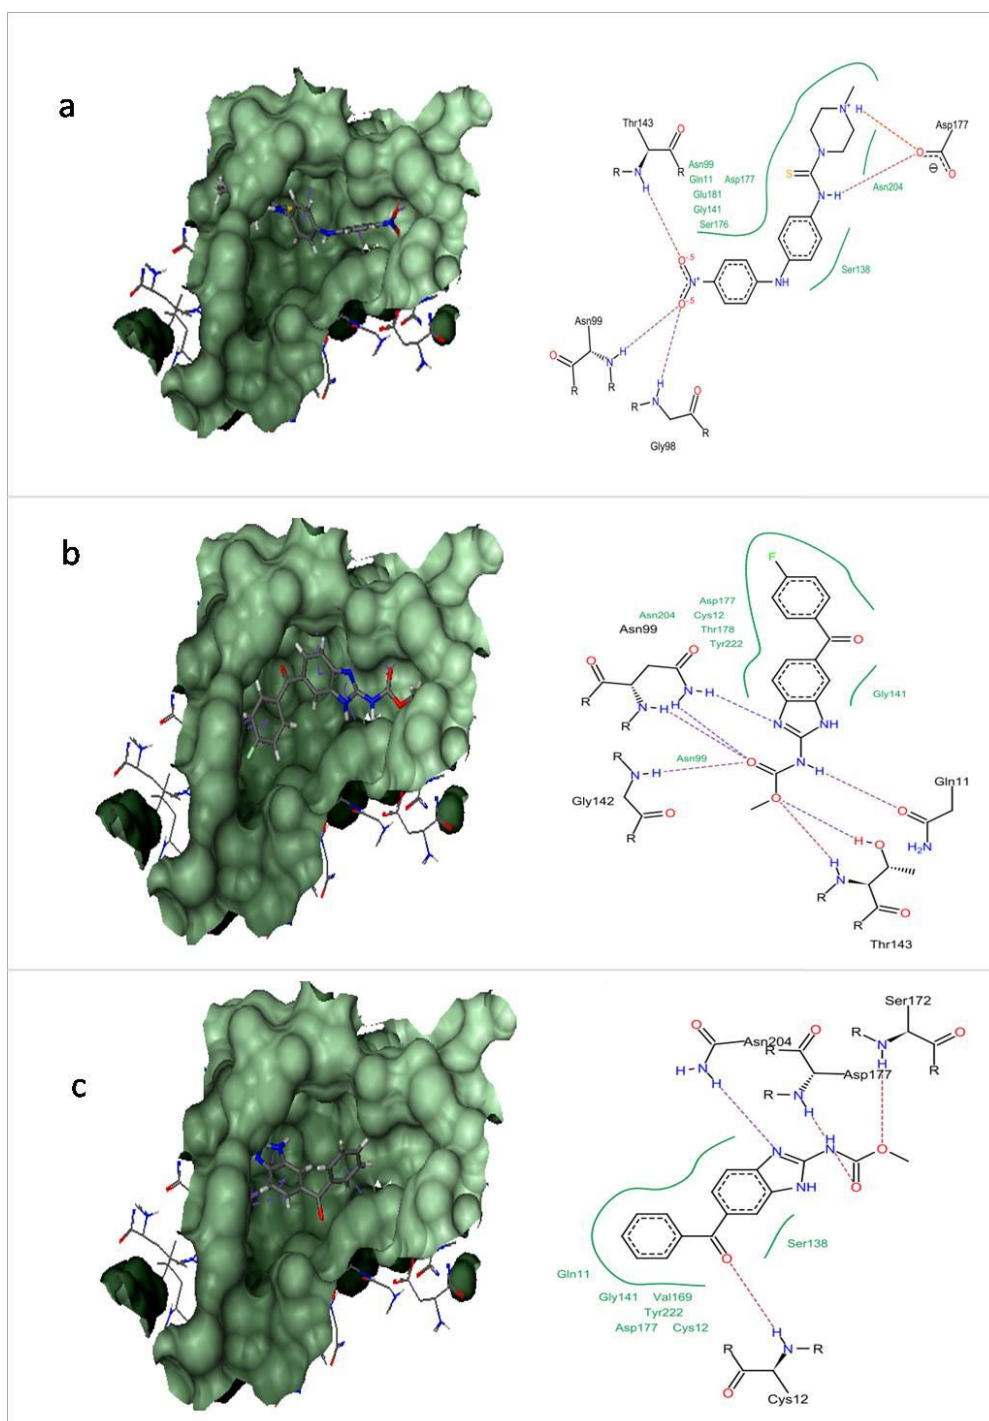

The docking complex and interactions of best docked compounds with  $\beta$ -Tubulin (BxTUB) from *B. xylophilus*. a. Amocarzine (Binding energy: -27.122 kJ/mol) b. Flubendazole (binding energy: -28.058 kJ/mol) c. Mebendazole (binding energy : -25.531 kJ/mol)

## Supplementary Tables

Supplementary Table S1. The measured quality factor values along with ramachandrn plot residue distributions for the modelled proteins

| S.No. | Model   | Amino acids residues (%) in Ramachandran plot (PROCHECK) |      |     |     | Verify 3D (%) | ERRAT  |
|-------|---------|----------------------------------------------------------|------|-----|-----|---------------|--------|
|       |         | MFA                                                      | GAR  | AAR | DAR |               |        |
| 1     | BxCLCP  | 94.5                                                     | 5.5  | 0.0 | 0.0 | 87.05         | 97.238 |
| 2     | BxPRX   | 81.3                                                     | 16.1 | 2.1 | 0.5 | 83.54         | 92.160 |
| 3     | BxHSP90 | 92.8                                                     | 7.2  | 0.0 | 0.0 | 90.38         | 95.750 |
| 4     | BxVAP-3 | 85.7                                                     | 10.6 | 0.6 | 3.1 | 89.78         | 92.164 |
| 5     | BxTUB   | 94.7                                                     | 4.2  | 0.5 | 0.5 | 98.83         | 93.258 |

MFA- Most favoured region; GAR-Generously allowed region; AAR- Additionally allowed region; DAR-Disallowed region.

Supplementary Table S2. The predicted molecular properties confined to the druglike properties (based on Lipinski's rule of five) and biological activity prediction (antihelmentics).

| Compounds<br>Pubchem<br>ID | Molinspiration server predictions |        |        |        |     |       |       |       |        | PASS server<br>predictions |       |
|----------------------------|-----------------------------------|--------|--------|--------|-----|-------|-------|-------|--------|----------------------------|-------|
|                            | miLogP                            | TPSA   | natoms | Mol.Wt | nON | nOHNH | nviol | nrotb | volume | pa                         | pi    |
| 10255                      | -0.81                             | 86.62  | 15     | 213.23 | 5   | 3     | 0     | 4     | 196.58 | 0.581                      | 0.004 |
| 25429                      | 1.46                              | 67.02  | 14     | 191.19 | 5   | 2     | 0     | 2     | 165.8  | 0.882                      | 0.002 |
| 8663                       | 2.64                              | 20.23  | 11     | 144.17 | 1   | 1     | 0     | 0     | 136.05 | 0.552                      | 0.01  |
| 708857                     | 2.47                              | 15.6   | 14     | 206.31 | 2   | 0     | 0     | 2     | 194.34 | 0.78                       | 0.003 |
| 42574                      | 8.17                              | 73.12  | 30     | 663.08 | 4   | 2     | 2     | 4     | 391.56 | 0.488                      | 0.019 |
| 5430                       | 2.35                              | 41.58  | 14     | 201.25 | 3   | 1     | 0     | 1     | 166.83 | 0.862                      | 0.002 |
| 442658                     | -1.68                             | 250.96 | 40     | 564.5  | 14  | 10    | 3     | 4     | 461.51 | 0.343                      | 0.072 |
| 4030                       | 2.89                              | 84.09  | 22     | 295.3  | 6   | 2     | 0     | 4     | 256.19 | 0.821                      | 0.002 |
| 40854                      | 2.84                              | 84.09  | 22     | 315.35 | 6   | 2     | 0     | 4     | 262.88 | 0.902                      | 0.001 |
| 26879                      | 2.08                              | 15.6   | 14     | 204.3  | 2   | 0     | 0     | 1     | 183.77 | 0.818                      | 0.002 |
| 3913                       | 2.08                              | 15.6   | 14     | 204.3  | 2   | 0     | 0     | 1     | 183.77 | 0.818                      | 0.002 |
| 2871                       | 4.84                              | 57.91  | 22     | 362.77 | 5   | 0     | 0     | 6     | 289.59 | 0.841                      | 0.002 |
| 5464102                    | 3.44                              | 76.35  | 26     | 371.47 | 7   | 2     | 0     | 6     | 329.95 | 0.626                      | 0.004 |
| 3334                       | 3.4                               | 67.02  | 21     | 299.36 | 5   | 2     | 0     | 4     | 255.33 | 0.914                      | 0.001 |
| 35802                      | 3.05                              | 84.09  | 23     | 313.29 | 6   | 2     | 0     | 4     | 261.12 | 0.848                      | 0.002 |

The molecular properties for the compounds are predicted at molinspiration server to define the compounds druglikness. miLogP- Molinspiration LogP (Octanol-water partition coefficient); TPSA- Total polar surface area (drug transport properties); natoms-Number of atoms; Mol.Wt (g/mol)- Molecular weight, nON- number of hydrogen bond acceptors; nOHNH- number of hydrogen bond donors; nviolations- Number of Lipinski's rule of five parameters violations; nrotb-Number of Rotatable Bonds (molecular flexibility); The biological activity at PASS server is predicted for antihelminthic properties of the compounds. pa-probability to be active; pi-probability to be inactive.

Supplementary Table S3. The 15 compounds with nematocidal activity considered in this study for docking against five targets from *B. xylophilus*.

| S.no | Pubchem id | Compound name | 2D structure                                                                        | SMILES notation                                                                                                                                   |
|------|------------|---------------|-------------------------------------------------------------------------------------|---------------------------------------------------------------------------------------------------------------------------------------------------|
| 1.   | 10255      | Kainic acid   |    | <chem>CC(=C)[C@H]1CN[C@@H]([C@H]1CC(=O)O)C(=O)O</chem>                                                                                            |
| 2.   | 25429      | Carbendazole  |    | <chem>COC(=O)NC1=NC2=CC=CC=C2N1</chem>                                                                                                            |
| 3.   | 8663       | 2-Naphthol    |   | <chem>C1=CC=C2C=C(C=CC2=C1)O</chem>                                                                                                               |
| 4.   | 708857     | Pyrantel      |  | <chem>CN1CCCN=C1/C=C/C2=CC=CS2</chem>                                                                                                             |
| 5.   | 42574      | Closantel     |  | <chem>CC1=CC(=C(C=C1NC(=O)C2=CC(=CC(=C2O)I)I)Cl)C(C#N)C3=CC=C(C=C3)Cl</chem>                                                                      |
| 6.   | 5430       | Thiabendazole |  | <chem>C1=CC=C2C(=C1)NC(=N2)C3=CSC=N3</chem>                                                                                                       |
| 7.   | 442658     | Schaftoside   |  | <chem>C1[C@@H]([C@@H]([C@H]([C@@H](O1)C2=C(C(=C(C3=C2OC(=CC3=O)C4=CC=C(C=C4)O)O)[C@H]5[C@@H]([C@H]([C@@H]([C@H]([C@@H](O5)CO)O)O)O)O)O)O)O</chem> |

|     |         |              |                                                                                     |                                                                       |
|-----|---------|--------------|-------------------------------------------------------------------------------------|-----------------------------------------------------------------------|
| 8.  | 4030    | Mebendazole  | 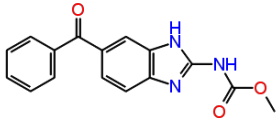   | <chem>COC(=O)NC1=NC2=C(N1)C=C(C=C2)C(=O)C3=CC=CC=C3</chem>            |
| 9.  | 40854   | Oxfendazole  |    | <chem>COC(=O)NC1=NC2=C(N1)C=C(C=C2)S(=O)C3=CC=CC=C3</chem>            |
| 10. | 26879   | Levamisole   |    | <chem>C1CSC2=N[C@H](CN21)C3=CC=CC=C3</chem>                           |
| 11. | 3913    | Tetramisole  |    | <chem>C1CSC2=NC(N2)C3=CC=CC=C3</chem>                                 |
| 12. | 2871    | Coumaphos    |   | <chem>CCOP(=S)(OCC)OC1=CC2=C(C=C1)C(=C(C(=O)O2)Cl)C</chem>            |
| 13. | 5464102 | Amocarzine   |  | <chem>CN1CCN(CC1)C(=S)NC2=CC=C(C=C2)NC3=CC=C(C=C3)[N+](=O)[O-]</chem> |
| 14. | 3334    | Fenbendazole |  | <chem>COC(=O)NC1=NC2=C(N1)C=C(C=C2)SC3=CC=CC=C3</chem>                |
| 15. | 35802   | Flubendazole |  | <chem>COC(=O)NC1=NC2=C(N1)C=C(C=C2)C(=O)C3=CC=C(C=C3)F</chem>         |

Supplementary Table S4. Docking interactions of the binding site residues with all the 15 compounds against Cathepsin L- Like cysteine proteinase (BxCLCP) from *B.xylophilus*

| <b>10255</b>    | <b>25429</b>    | <b>8663</b>    | <b>708857</b>  | <b>42574</b>    | <b>5430</b>     | <b>442658</b>   | <b>4030</b>     | <b>40854</b>   | <b>26879</b>   | <b>3913</b>    | <b>2871</b>    | <b>5464102</b>  | <b>3334</b>     | <b>35802</b>    |
|-----------------|-----------------|----------------|----------------|-----------------|-----------------|-----------------|-----------------|----------------|----------------|----------------|----------------|-----------------|-----------------|-----------------|
| Ile25*          | #Ile25*         | Ile25          | -              | Ile25*          | #Ile25*         | #Ile25*         | -               | -              | #Ile25*        | -              | #Ile25*        | -               | #Ile25*         | Ile25*          |
| -               | -               | -              | Gln26          | -               | -               | #Gln26*         | -               | -              | -              | -              | -              | #Gln26*         | -               | -               |
| -               | His27           | -              | -              | -               | His27           | -               | -               | -              | -              | -              | -              | His27           | His27           | -               |
| -               | -               | -              | #Glu28*        | -               | -               | -               | -               | -              | -              | -              | -              | #Glu28*         | -               | -               |
| Gln62*          | -               | -              | -              | Gln62*          | -               | Gln62*          | #Gln62*         | #Gln62*        | #Gln62*        | Gln62*         | Gln62*         | -               | -               | #Gln62*         |
| -               | -               | -              | -              | #Cys65*         | -               | -               | #Cys65*         | Cys65*         | -              | -              | -              | -               | -               | #Cys65*         |
| Gly66           | -               | -              | -              | Gly66           | -               | Gly66           | Gly66           | -              | Gly66          | Gly66          | -              | -               | -               | Gly66           |
| #Cys68*         | -               | -              | -              | -               | -               | Cys68           | -               | -              | Cys68          | Cys68          | Cys68          | -               | -               | Cys68           |
| -               | -               | -              | -              | -               | -               | Asn104*         | -               | -              | -              | -              | -              | -               | -               | -               |
| -               | -               | -              | -              | Asn107          | -               | #Asn107*        | -               | -              | -              | -              | -              | -               | -               | -               |
| -               | -               | -              | -              | Gly108          | -               | Gly108          | -               | -              | -              | -              | -              | -               | -               | -               |
| -               | -               | Asp110*        | -              | -               | -               | -               | -               | -              | -              | -              | -              | -               | -               | -               |
| -               | -               | #Asp111*       | -              | -               | -               | -               | -               | -              | -              | -              | -              | -               | -               | -               |
| -               | -               | -              | Lys113         | -               | -               | -               | -               | -              | -              | -              | -              | Lys113          | -               | -               |
| -               | -               | Val176         | -              | -               | -               | -               | -               | -              | -              | -              | -              | -               | -               | -               |
| -               | -               | Gly177         | -              | -               | -               | -               | -               | -              | -              | -              | -              | -               | -               | -               |
| -               | -               | -              | -              | -               | -               | -               | -               | Val180*        | -              | -              | -              | -               | -               | -               |
| -               | -               | -              | -              | -               | Ile203          | -               | -               | -              | -              | -              | -              | -               | Ile203          | -               |
| -               | -               | Leu204         | -              | -               | -               | -               | -               | -              | -              | -              | -              | -               | -               | -               |
| -               | #Gly205*        | -              | -              | -               | Gly205          | -               | -               | -              | -              | -              | -              | -               | Gly205*         | -               |
| #Thr206*        | #Thr206*        | -              | -              | -               | Thr206          | -               | -               | -              | -              | -              | Thr206         | Thr206*         | #Thr206*        | Thr206*         |
| #His207*        | -               | -              | -              | -               | -               | His207          | -               | -              | His207         | His207         | His207         | -               | -               | His207          |
| -               | -               | -              | -              | Trp230          | -               | -               | #Trp230*        | Trp230         | Trp230         | #Trp230*       | #Trp230*       | -               | -               | Trp230          |
| <b>-17.6525</b> | <b>-14.8791</b> | <b>-9.5734</b> | <b>-8.0396</b> | <b>-15.6181</b> | <b>-12.0705</b> | <b>-10.4349</b> | <b>-18.3215</b> | <b>-15.653</b> | <b>-8.1927</b> | <b>-6.7261</b> | <b>-6.7703</b> | <b>-18.7524</b> | <b>-14.3912</b> | <b>-19.3639</b> |

\* Residues involved in H-bond interactions; #\*Residues involved in H-bond and non-bonded interactions. The other residues are involved in non-bonded interactions. Binding energies (kJ/mol) are provided in last row.

Supplementary Table S5. Docking interactions of the binding site residues with all the 15 compounds against 2-cysteine peroxiredoxin

(BxPRX) from *B.xylophilus*

| 10255           | 25429          | 8663           | 708857         | 42574          | 5430           | 442658         | 4030            | 40854           | 26879          | 3913          | 2871           | 5464102         | 3334           | 35802           |
|-----------------|----------------|----------------|----------------|----------------|----------------|----------------|-----------------|-----------------|----------------|---------------|----------------|-----------------|----------------|-----------------|
| Ile6            | -              | -              | -              | -              | -              | -              | Ile6            | Ile6            | -              | -             | Ile6           | Ile6            | Ile6           | Ile6            |
| -               | -              | -              | -              | Ile6           | -              | -              | -               | -               | -              | -             | -              | -               | -              | -               |
| -               | -              | -              | -              | -              | -              | -              | -               | -               | -              | -             | -              | -               | -              | -               |
| -               | -              | -              | -              | -              | -              | -              | -               | -               | -              | -             | -              | -               | -              | -               |
| Arg137*         | -              | -              | -              | -              | -              | Arg137*        | Arg137*         | Arg137*         | -              | -             | -              | arg137*         | Arg137*        | Arg137*         |
| -               | -              | -              | -              | #Gln138*       | -              | #Gln138*       | Gln138          | Gln138*         | -              | -             | #Gln138*       | Gln138          | Gln138         | #Gln138*        |
| -               | -              | -              | -              | #Ile139*       | -              | -              | #Ile139*        | -               | -              | -             | Ile139*        | ile139*         | #Ile139*       | #Ile139*        |
| -               | Thr140         | Thr140         | Thr140         | -              | Thr140         | Thr140*        | -               | -               | Thr140         | Thr140        | -              | -               | -              | -               |
| -               | #Asn142*       | -              | Asn142*        | -              | -              | -              | -               | -               | #Asn142*       | -             | -              | -               | -              | -               |
| -               | Arg148         | -              | Arg148         | -              | Arg148         | -              | -               | -               | Arg148         | Arg148        | -              | -               | -              | -               |
| -               | Ser149*        | Ser149*        | #Ser149*       | -              | #Ser149*       | -              | -               | -               | #Ser149*       | #Ser149*      | -              | Leu156          | -              | -               |
| -               | -              | -              | -              | -              | -              | -              | -               | -               | -              | -             | -              | -               | -              | -               |
| -               | -              | Glu152         | Glu152         | -              | Glu152         | #Glu152*       | -               | -               | Glu152         | Glu152        | -              | glu152*         | -              | -               |
| -               | -              | -              | -              | -              | Thr153         | -              | -               | -               | -              | #Thr153*      | -              | -               | -              | -               |
| -               | -              | -              | -              | Arg155*        | -              | Arg155*        | -               | -               | -              | -             | Arg155*        | -               | -              | -               |
| -               | -              | Leu156         | -              | Leu156         | Leu156         | Leu156         | -               | -               | -              | Leu156        | Leu156         | -               | -              | -               |
| -               | -              | -              | -              | -              | -              | -              | -               | -               | -              | -             | Ala159         | -               | -              | -               |
| Phe160          | -              | -              | -              | Phe160         | -              | Phe160         | Phe160          | Phe160          | -              | -             | Phe160         | Phe160          | Phe160         | Phe160          |
| <b>-18.5856</b> | <b>-16.525</b> | <b>-11.793</b> | <b>-12.548</b> | <b>-6.0856</b> | <b>-15.395</b> | <b>-9.6139</b> | <b>-20.1114</b> | <b>-19.8592</b> | <b>-12.361</b> | <b>-10.75</b> | <b>-18.175</b> | <b>-30.1634</b> | <b>-18.826</b> | <b>-23.2623</b> |

\* Residues involved in H-bond interactions; #\*Residues involved in H-bond and non-bonded interactions. The other residues are involved in non-bonded interactions. Binding energies (kJ/mol) are provided in last row.



Supplementary Table S6. Docking interactions of the binding site residues with all the 15 compounds against Heat Shock Protein 90

(BxHSP90) from *B.xylophilus*

| 10255          | 25429          | 8663           | 708857        | 42574          | 5430         | 442658         | 4030           | 40854          | 26879          | 3913           | 2871           | 5464102        | 3334           | 35802          |
|----------------|----------------|----------------|---------------|----------------|--------------|----------------|----------------|----------------|----------------|----------------|----------------|----------------|----------------|----------------|
| -              | -              | -              | -             | Trp323         | -            | -              | -              | -              | #Trp323*       | #Trp323*       | Trp323*        | -              | -              | -              |
| -              | -              | -              | -             | -              | -            | -              | -              | -              | Met327         | -              | -              | -              | -              | -              |
| -              | -              | -              | -             | -              | -            | Arg329*        | -              | -              | -              | -              | -              | -              | -              | -              |
| #Met331*       | #Met331*       | -              | -             | Met331         | Met331*      | -              | Met331*        | Met331*        | Met331         | -              | Met331         | -              | Met331*        | #Met331*       |
| Lys332         | -              | Lys332         | Lys332        | #Lys332*       | Lys332       | #Lys332*       | Lys332         | Lys332         | -              | -              | -              | #Lys332*       | Lys332         | Lys332         |
| -              | -              | -              | Ala333        | -              | -            | -              | Ala333         | Ala333         | -              | -              | -              | Ala333         | Ala333         | -              |
| -              | Gln334*        | -              | #Gln334*      | -              | Gln334       | Gln334*        | #Gln334*       | Gln334*        | -              | -              | -              | Gln334         | #Gln334*       | #Gln334*       |
| -              | -              | -              | Ala335        | -              | Ala335       | -              | Ala335         | -              | -              | -              | -              | -              | Ala335         | Ala335         |
| -              | -              | -              | -             | -              | -            | -              | -              | -              | -              | -              | -              | -              | -              | -              |
| #Arg337*       | #Arg337*       | #Arg337*       | Arg337        | Arg337         | #Arg337*     | -              | #Arg337*       | #Arg337*       | #Arg337*       | Arg337*        | #Arg337*       | #Arg337*       | #Arg337*       | #Arg337*       |
| Asp338         | -              | Asp338*        | -             | Asp338         | Asp338       | -              | -              | -              | -              | -              | Asp338         | Asp338         | -              | -              |
| Ser339         | -              | Ser339         | -             | Ser339         | Ser339       | -              | -              | -              | -              | -              | -              | Ser339         | -              | -              |
| -              | -              | -              | -             | -              | -            | -              | -              | -              | -              | -              | -              | -              | -              | -              |
| -              | -              | -              | -             | -              | -            | -              | -              | -              | -              | Thr341         | Thr341         | -              | -              | -              |
| Met342         | -              | Met342         | -             | Met342         | Met342       | Met342         | -              | -              | -              | -              | -              | Met342         | -              | -              |
| -              | -              | -              | -             | -              | -            | -              | -              | -              | -              | -              | -              | -              | -              | -              |
| -              | -              | -              | -             | #Ser394*       | -            | #Ser394*       | -              | -              | -              | -              | -              | -              | -              | -              |
| <b>-11.942</b> | <b>-12.365</b> | <b>-9.6124</b> | <b>-8.519</b> | <b>-8.3846</b> | <b>-12.1</b> | <b>-4.0356</b> | <b>-18.993</b> | <b>-13.344</b> | <b>-6.1674</b> | <b>-5.2535</b> | <b>-1.7963</b> | <b>-22.895</b> | <b>-14.743</b> | <b>-15.053</b> |

\* Residues involved in H-bond interactions; #\*Residues involved in H-bond and non-bonded interactions. The other residues are involved in non-bonded interactions . Binding energies (kJ/mol) are provided in last row.

Supplementary Table S7. Docking interactions of the binding site residues with all the 15 compounds against Venom allergen Protein-3

(BxVAP-3) from *B.xylophilus*

| <b>10255</b>   | <b>25429</b>   | <b>8663</b>    | <b>708857</b>  | <b>42574</b>   | <b>5430</b>    | <b>442658</b>  | <b>4030</b>    | <b>40854</b>   | <b>26879</b>   | <b>3913</b>    | <b>2871</b>    | <b>5464102</b>  | <b>3334</b>    | <b>35802</b>   |
|----------------|----------------|----------------|----------------|----------------|----------------|----------------|----------------|----------------|----------------|----------------|----------------|-----------------|----------------|----------------|
| Tyr79*         | -              | -              | -              | Tyr79          | Tyr79          | -              | -              | Tyr79          | Tyr79          | Tyr79          | #Tyr79*        | -               | -              | -              |
| -              | -              | -              | -              | -              | -              | -              | -              | -              | -              | -              | #Leu91*        | -               | -              | -              |
| -              | -              | -              | -              | -              | -              | ala92          | -              | -              | -              | -              | Ala92          | -               | -              | -              |
| Ala93*         | -              | #Ala93*        | -              | #Ala93*        | #Ala93*        | Ala93*         | Ala93          | #Ala93*        | #Ala93*        | #Ala93*        | #Ala93*        | -               | -              | ala93          |
| Gln94*         | -              | Gln94          | -              | Gln94          | Gln94          | Gln94          | Gln94          | Gln94          | #Gln94*        | Gln94          | -              | -               | -              | Gln94          |
| -              | #Trp95*        | Trp95          | #Trp95*        | Trp95          | -              | Trp95          | #Trp95*        | Trp95          | Trp95          | -              | -              | #Trp95*         | #Trp95*        | #Trp95*        |
| -              | -              | -              | Pro96          | -              | -              | -              | -              | -              | -              | -              | -              | #Pro96*         | #Pro96*        | -              |
| -              | -              | -              | His97          | -              | -              | -              | -              | -              | -              | -              | -              | His97           | #His97*        | -              |
| -              | -              | -              | -              | -              | -              | -              | -              | -              | -              | -              | -              | -               | Thr98          | -              |
| Lys107*        | -              | -              | -              | Lys107         | -              | #Lys107*       | -              | -              | -              | -              | #Lys107*       | -               | -              | -              |
| -              | -              | -              | -              | -              | -              | -              | -              | -              | -              | -              | -              | -               | -              | -              |
| -              | Asn160         | -              | -              | -              | -              | -              | #Asn160*       | Asn160*        | -              | -              | -              | #Asn160*        | -              | #Asn160*       |
| -              | -              | Trp161         | -              | Trp161         | Trp161         | -              | Trp161         | Trp161         | Trp161         | Trp161         | -              | -               | -              | Trp161         |
| <b>-12.681</b> | <b>-15.173</b> | <b>-11.458</b> | <b>-9.0794</b> | <b>-15.835</b> | <b>-13.143</b> | <b>-5.3029</b> | <b>-18.699</b> | <b>-17.071</b> | <b>-12.326</b> | <b>-12.811</b> | <b>-5.8927</b> | <b>-19.2792</b> | <b>-14.202</b> | <b>-17.962</b> |

\* Residues involved in H-bond interactions; #\*Residues involved in H-bond and non-bonded interactions. The other residues are involved in non-bonded interactions. Binding energies (kJ/mol) are provided in last row.

Supplementary Table S8. Docking interactions of the binding site residues with all the 15 compounds against  $\beta$ -Tubulin (BxTUB) from *B.xylophilus*

| 10255          | 25429         | 8663           | 708857         | 42574          | 5430           | 442658         | 4030           | 40854          | 26879          | 3913           | 2871           | 5464102        | 3334           | 35802          |
|----------------|---------------|----------------|----------------|----------------|----------------|----------------|----------------|----------------|----------------|----------------|----------------|----------------|----------------|----------------|
| -              | Ile6          | -              | -              | -              | -              | -              | -              | -              | -              | -              | -              | -              | -              | -              |
| -              | -             | -              | -              | Gln11          | -              | Gln11          | Gln11          | Gln11*         | Gln11          | Gln11          | Gln11          | Gln11          | #Gln11*        | Gln11*         |
| -              | Cys12         | -              | Cys12          | -              | Cys12          | Cys12          | #Cys12*        | Cys12          | -              | -              | Cys12          | -              | Cys12          | Cys12          |
| -              | -             | -              | -              | -              | -              | #Gln15*        | -              | -              | -              | -              | -              | -              | -              | -              |
| -              | -             | -              | -              | Glu69          | -              | -              | -              | -              | -              | -              | -              | -              | -              | -              |
| -              | -             | -              | -              | -              | -              | -              | -              | -              | Ala97          | -              | -              | -              | -              | -              |
| -              | -             | -              | -              | Gly98*         | -              | #Gly98*        | -              | -              | Gly98          | Gly98          | Gly98          | Gly98*         | -              | -              |
| -              | -             | -              | -              | #Asn99*        | -              | #Asn99*        | -              | #Asn99*        | #Asn99*        | #Asn99*        | #Asn99*        | #Asn99*        | #Asn99*        | #Asn99*        |
| #Ser138*       | Ser138*       | Ser138         | -              | -              | Ser138*        | Ser138*        | Ser138         | -              | -              | -              | Ser138*        | Ser138         | #Ser138*       | -              |
| Leu139*        | -             | -              | -              | -              | -              | -              | -              | Gly142*        | -              | -              | -              | -              | -              | -              |
| -              | -             | -              | -              | -              | Gly140         | -              | -              | -              | -              | -              | -              | -              | -              | -              |
| -              | -             | -              | -              | Gly141         | -              | Gly141         | Gly141         | Gly141         | Gly141         | Gly141         | Gly141         | Gly141         | Gly141         | Gly141         |
| -              | -             | -              | -              | -              | -              | Gly142         | -              | -              | Gly142*        | Gly142*        | Gly142*        | -              | Gly142*        | Gly142*        |
| -              | -             | -              | -              | -              | -              | -              | -              | Thr143*        | Thr143*        | #Thr143*       | Thr143*        | Thr143*        | Thr143*        | Thr143*        |
| Val169         | Val169        | Val169         | Val169         | Val169         | -              | Val169         | Val169         | Val169         | -              | -              | -              | -              | Val169         | -              |
| Ser172*        | -             | -              | -              | -              | -              | -              | Ser172*        | -              | -              | -              | -              | -              | -              | -              |
| -              | -             | -              | -              | -              | -              | -              | -              | -              | -              | -              | --             | Ser176         | -              | -              |
| #Asp177*       | Asp177*       | #Asp177*       | #Asp177*       | Asp177         | #Asp177*       | -              | #Asp177*       | Asp177         | -              | -              | -              | #Asp177*       | -              | Asp177         |
| -              | -             | -              | Thr178         | -              | Thr178         | -              | -              | Thr178         | --             | Thr178         | -              | -              | -              | Thr178         |
| #Glu181*       | -             | #Glu181*       | -              | -              | Glu181         | -              | -              | -              | -              | -              | -              | Glu181         | -              | -              |
| Asn204*        | Asn204*       | -              | Asn204*        | -              | Asn204*        | #Asn204*       | Asn204*        | -              | -              | -              | -              | Asn204         | -              | Asn204         |
| -              | Tyr222        | -              | Tyr222         | -              | Tyr222         | Tyr222         | Tyr222         | Tyr222         | -              | -              | -              | -              | Tyr222         | Tyr222         |
| -              | -             | -              | -              | -              | -              | Asn226*        | -              | -              | -              | -              | -              | -              | -              | -              |
| <b>-24.909</b> | <b>-21.44</b> | <b>-12.053</b> | <b>-12.559</b> | <b>-14.155</b> | <b>-16.532</b> | <b>-22.876</b> | <b>-25.531</b> | <b>-21.242</b> | <b>-13.724</b> | <b>-17.188</b> | <b>-15.065</b> | <b>-27.122</b> | <b>-24.141</b> | <b>-28.058</b> |

\* Residues involved in H-bond interactions; #\*Residues involved in H-bond and non-bonded interactions. The other residues are involved in non-bonded interactions . Binding energies (kJ/mol) are provided in last row.

Supplementary Table S9. DFT calculations pertaining to the molecular chemical reactivity for Amocarzine, flubendazole and Mebendazole

| Compound     | HOMO    | LUMO    | Energy Gap | Ionization potential (IP) (eV) | Electron affinity (EA) (eV) | Electro negativity ( $\chi$ ) (eV) | Electro chemical potential ( $\mu$ ) (eV) | Hardness ( $\eta$ ) (eV) | Softness ( $\sigma$ ) (eV) | Electrophilicity ( $\omega$ ) (eV) |
|--------------|---------|---------|------------|--------------------------------|-----------------------------|------------------------------------|-------------------------------------------|--------------------------|----------------------------|------------------------------------|
| Amocarzine   | -0.9453 | -0.3366 | 0.6087     | 0.9453                         | 0.3366                      | 0.64095                            | -0.64095                                  | 0.3043                   | 3.2862                     | -0.6746                            |
| Flubendazole | -2.3080 | -0.1142 | 2.1938     | 2.3080                         | 0.1142                      | 1.2111                             | -1.2111                                   | 1.0969                   | 0.9116                     | -0.6685                            |
| Mebendazole  | -2.5317 | -0.1904 | 2.3413     | 2.5317                         | 0.1904                      | 1.36105                            | -1.36105                                  | 1.1706                   | 0.8542                     | -0.7912                            |

The calculated HOMO-LUMO orbital energies are used to estimate the ionization energy, electron affinity, electro negativity, electronic chemical potential, molecular hardness, molecular softness, and Electrophilicity index by using the following equations:

$$\text{Ionization energy (IE)} = -\epsilon_{\text{HOMO}},$$

$$\text{Electron affinity (EA)} = -\epsilon_{\text{LUMO}},$$

$$\text{Electro negativity } (\chi) = (\text{IE} + \text{EA})/2,$$

$$\text{Electronic chemical potential } (\mu) = -\chi,$$

$$\text{Chemical hardness } (\eta) = (\text{IE} - \text{EA})/2,$$

$$\text{Chemical softness } (\sigma) = 1/\eta,$$

$$\text{Electrophilicity index } (\omega) = \mu^2/2\eta.$$
